# Supplementary material for: Cascade co-polarized hydro-charged nanofibers enable long-term and harsh-environment-tolerant air filtration
Source: Royal Society of Chemistry journal article supplement (doi:10.1039/d4ta06493c), 2024-01-01
Supplement: d4ta06493c1.pdf [file d4ta06493c1.pdf]

## Supporting Information

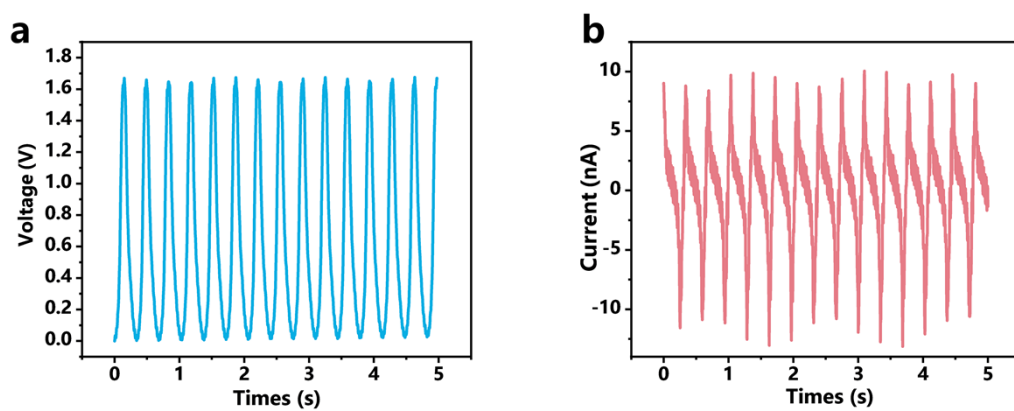

**Fig S1.** (a) Piezoelectric voltage output and (b) piezoelectric current output of PVDF hydro-charging electrospun fibers measuring  $2 \times 2$  cm under a pressure of 2 N.

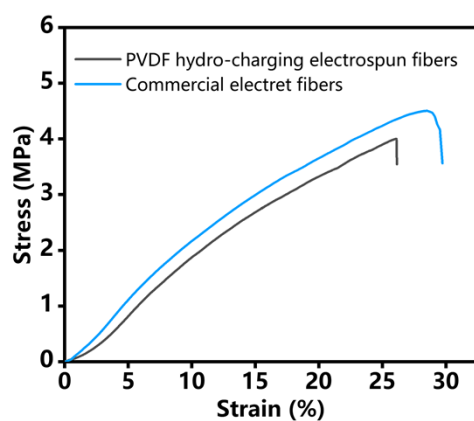

**Fig S2.** Stress-strain curve of PVDF hydro-charging electrospun fibers and commercial electret fibers.

**Table S1.** Comparison of the HCEF with other electret filters.

| Sample                      | Filtration Efficiency @0.3 $\mu$ m (%) | Pressure Drop (Pa) | Face Velocity (m/s) | Electret Effect (V) | Charge Decay Rate (%) | Mechanical Property (MPa) |
|-----------------------------|----------------------------------------|--------------------|---------------------|---------------------|-----------------------|---------------------------|
| This work                   | 99.43                                  | 41.7               | 0.053               | 6037                | 26.5                  | 4.0                       |
| Commercial electret fibers  | 76.09                                  | 35.1               | 0.053               | 1183                | 44.54                 | 4.49                      |
| Electrospun electret fibers | 99.712                                 | 38.1               | 0.053               | 2580                | 65.5                  | 6.72                      |

The performance of the commercial electret filter was obtained by testing under the same conditions as the HCEF in this experiment. The performance of the electrospun electret fibers was obtained from the published paper<sup>1</sup>.

1. S. Z. Lin, S. X. Wang, W. Yang, S. W. Chen, Z. S. Xu, X. W. Mo, H. Zhou, J. J. Duan, B. Hu and L. Huang, *Acs Nano*, 2021, **15**, 5486-5494.
